# Supplementary material for: The Roles of the PSEUDO-RESPONSE REGULATORs in Circadian Clock and Flowering Time in Medicago truncatula
Source: MDPI journal article supplement (doi:10.3390/ijms242316834), 2023-11-28
Supplement: s1 [file s1]

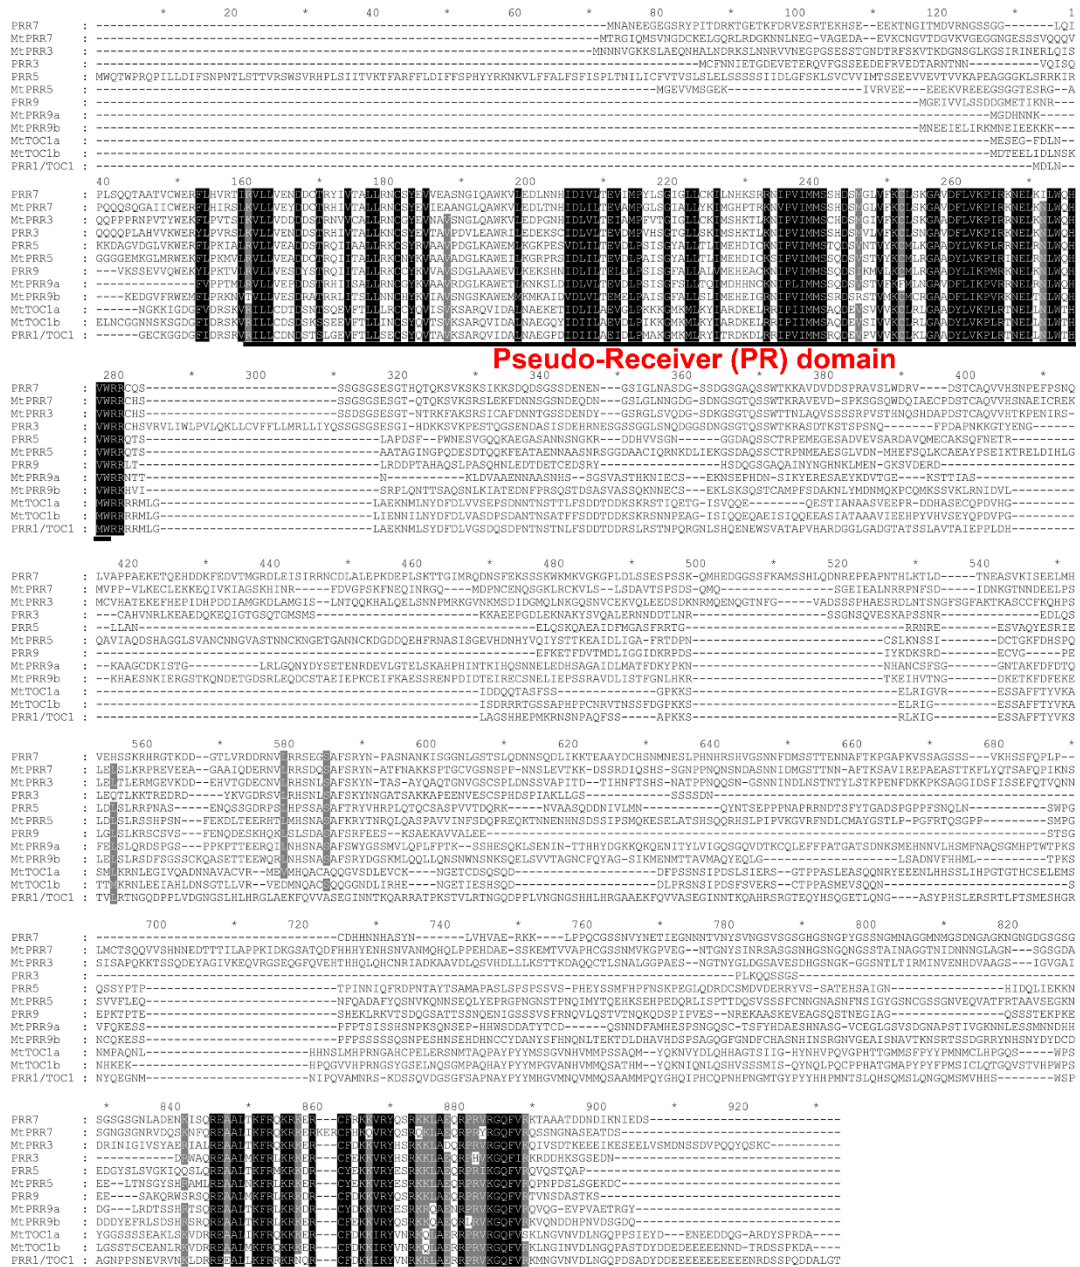

**Figure S1.** Amino acids alignment for PRR proteins in *Medicago truncatula* and *Arabidopsis thaliana*. The PR domain and CTT domain were marked in lines.

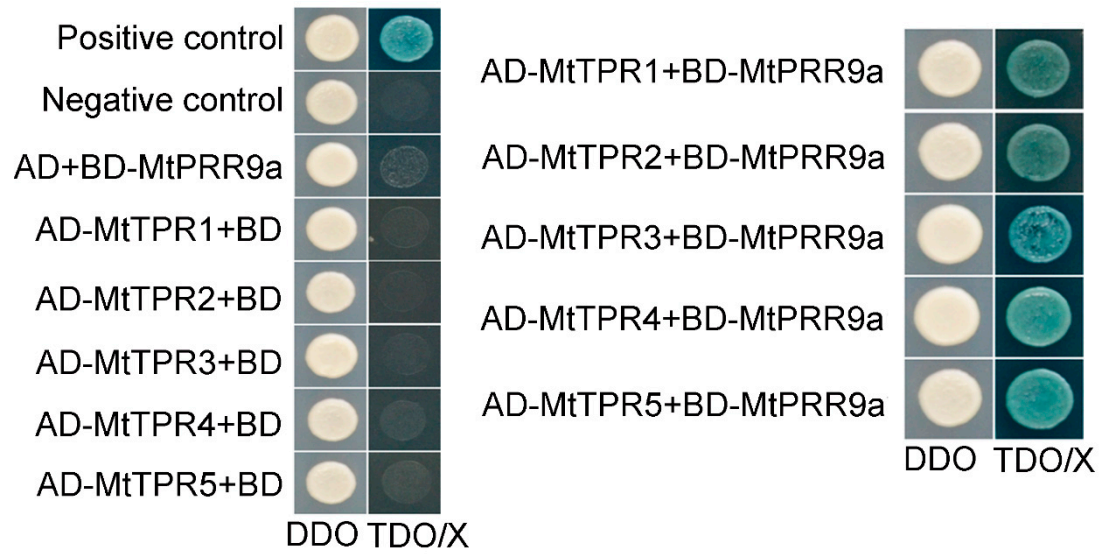

**Figure S2.** Identification of the interactions between MtPRR9a and MtTPR1-5 by Y2H. All transformants can grow on DDO medium. Yeast colonies that were able to grow on TDO with X- $\alpha$ -Gal and displayed blue coloration confirmed the protein-protein interaction.

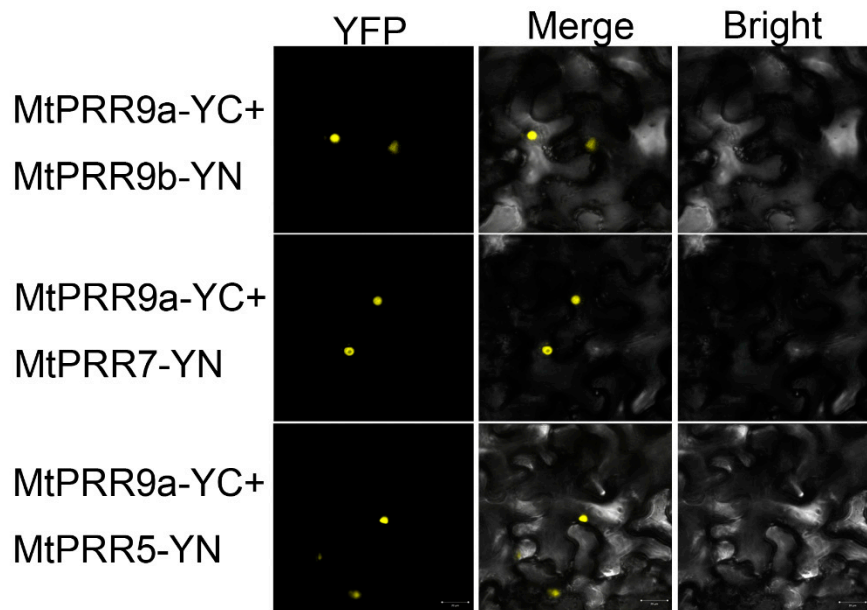

**Figure S3.** BiFC assays indicated that the MtPRR9a interacted with MtPRR9b, 7 and 5 in tobacco leaves.
