# Supplementary material for: The Roles of the PSEUDO-RESPONSE REGULATORs in Circadian Clock and Flowering Time in Medicago truncatula
Source: Int J Mol Sci. 2023 Nov 28;24(23):16834. doi: 10.3390/ijms242316834 (PMC10706769; doi:10.3390/ijms242316834)
Supplement: Supplementary file 1 [file ijms-24-16834-s001.zip › supplementary Table S1.xlsx]

## Sheet: Table S1
Supplementary Table S1 Primers used in this study
Primer name	Primer sequence	Application
MtPRR9a-CDS-F	CACCATGGGTGATCATAACAATAAGTTTG	For cloning the full length of CDS
MtPRR9a-CDS-R	GTAGCCTCTGGTTTCAGCTACT
MtPRR9b-CDS-F	CACCATGAATGAAGAAATTGAATTAATAAG
MtPRR9b-CDS-R	TTGATCACCACTATCTACATTTGG
MtPRR7-CDS-F	CACCATGACAAGGGGTATCCAGATGAGT
MtPRR7-CDS-R	ACTATCTGTTGCCTCACTTGCA
MtPRR5-CDS-F	CACCATGGGTGAGGTTGTAATGAGTGG
MtPRR5-CDS-R	GCAATCTTTTTCTCCAGAAAGAG
MtTPL-F	CACCATGTCATCTCTGAGTAGGGAATTG
MtTPL-R	TCACGTGACAGTCTTCGGCAATGGC
MtTPR1-F	CACCTATTCACCAAAATCCGAGGTCAAAC
MtTPR1-R	TCAATGACCATGACCCGGAAATGTC
MtTPR2-F	CACCATGACATCTTTGAGTAGAGAATTGGTG
MtTPR2-R	TCAGCTTGTCAATGTTGATCCTTG
MtTPR3-F	CACCATGACTTCGTTGAGTAGAGAATTGG
MtTPR3-R	TCAGCTTGTCACAGAGGATCCTTG
MtTPR4-F	CACCATGACTTCTTTGAGCAGAGAATTGG
MtTPR4-R	TCACACAGAGGACCCTTGATGC
MtTPR5-F	CACCATGTCTTCGTTAAGCAGAGAACTCG
MtTPR5-R	TCACACAGCAGTCTTGGGCAAGTC
MtPRR9a-qRT-F	ACGGGCTTAGAGACACGAGTTC	For qRT-PCR analysis of gene expression
MtPRR9a-qRT-R	AGTCGAAACTTTGTTAGAGCTGCTT
MtPRR9b-qRT-F	CATCCGCACAAAGCAACCTTA
MtPRR9b-qRT-R	CAGTCGATTGGTTGCAAGGAA
MtPRR7-qRT-F	ATCAGGCTCTCAGTGGGATCAG
MtPRR7-qRT-R	TGGAGTGAACAACTTGAGCACAA
MtPRR5-qRT-F	TGCGGAAGCATATCCAAGTG
MtPRR5-qRT-R	GATCACAGCCTGGCCTAAATG
MtGI-qRT-F	CCCGTTACACTACACGGATCATC
MtGI-qRT-R	GTATGGCGGACTGCCGAAT
MtLHY-qRT-F	TTGCCTTTCGGGCTCTATTCT
MtLHY-qRT-R	CAAATCATGAGGAGGTGAAAAGC
MtUBI-qRT-F	CTGACAGCCCACTGAATTGTGA
MtUBI-qRT-R	TTTTGGCATTGCTGCAAGC
